# Supplementary material for: The role of aluminum in controlling defect formation and polytypism in silicon carbide via thermal synthesis
Source: Royal Society of Chemistry journal article supplement (doi:10.1039/d5ma00751h), 2025-11-17
Supplement: d5ma00751h1.pdf [file d5ma00751h1.pdf]

## Supplementary information for

## Role of Aluminum in Controlling Defect Formation and Polytypism in Silicon Carbide via Thermal Synthesis

**Author list:** Sarah Morais Bezerra<sup>1,2</sup>, Sándor Kollár<sup>1,3,4</sup>, Luisa Souza Almeida<sup>5</sup>, Gábor Bortel<sup>1</sup>, Nikolett Jegenyész<sup>1</sup>, Bence Gábor Márkus<sup>6,1</sup>, Ferenc Simon<sup>1,4,6</sup>, Adam Gali<sup>1,7,8\*</sup> and David Beke<sup>1,9,\*</sup>

## X-ray Diffraction Data

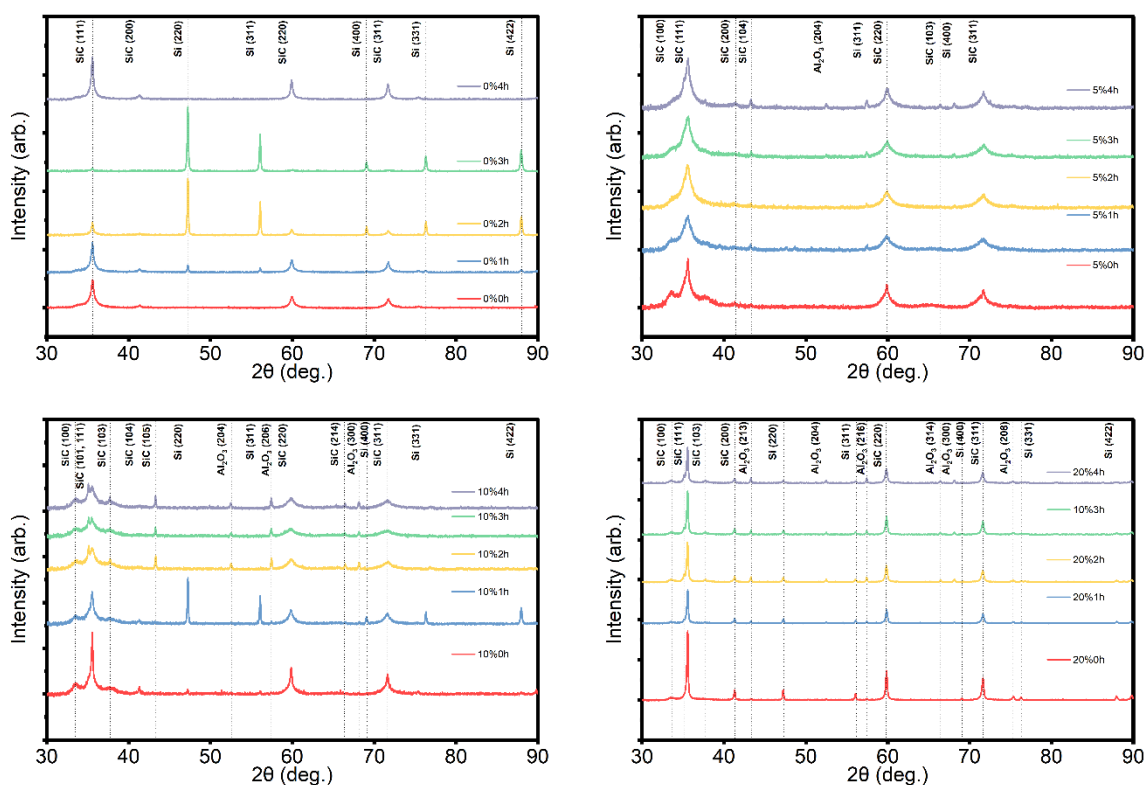

**Figure S1.** X-ray diffractograms after 0-4h milling times for samples a) 0%, b)5%, c)10% and d) 20% Al added to the precursor mixture.

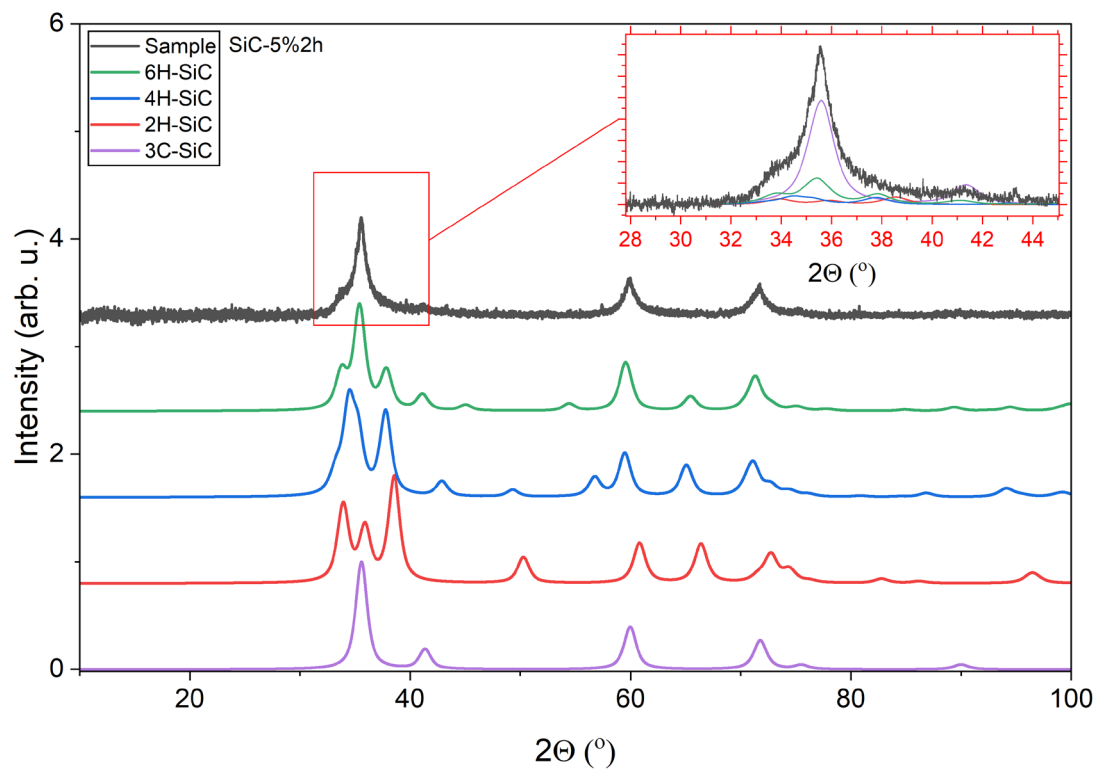

**Figure S2.** X-ray diffractogram for 5%Al-2h sample with the Rietveld fitting showing each polytype used for Rietveld refinement.

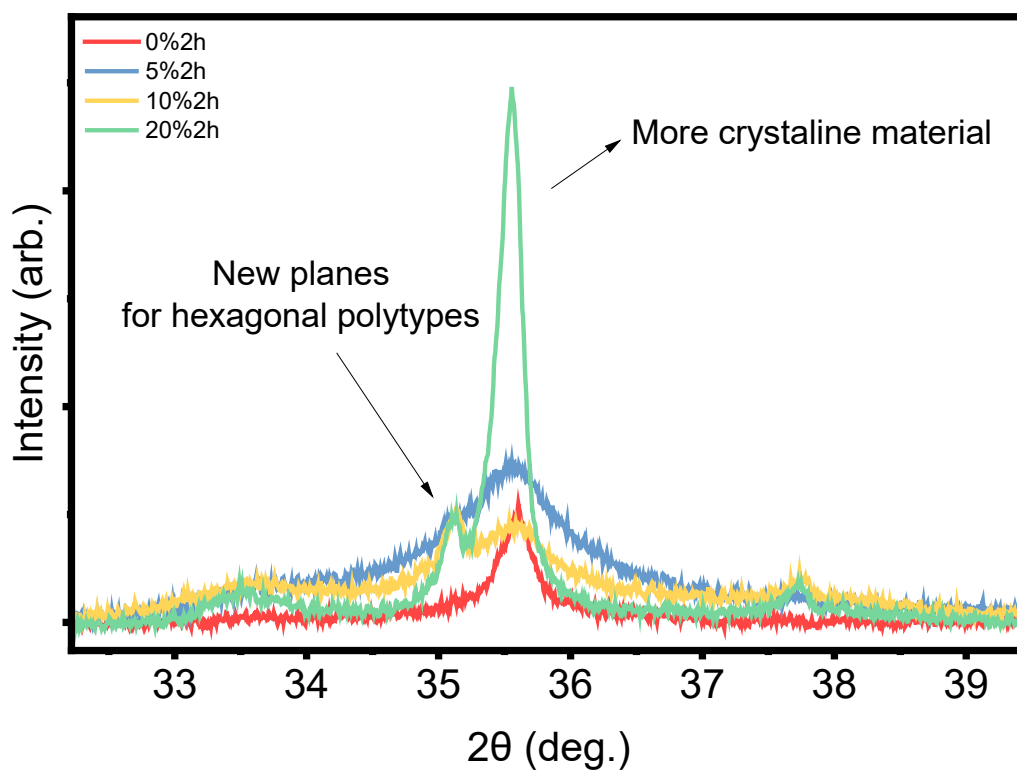

**Figure S3.** XRD comparison after reaction and the effect of Al on the peaks of the samples.

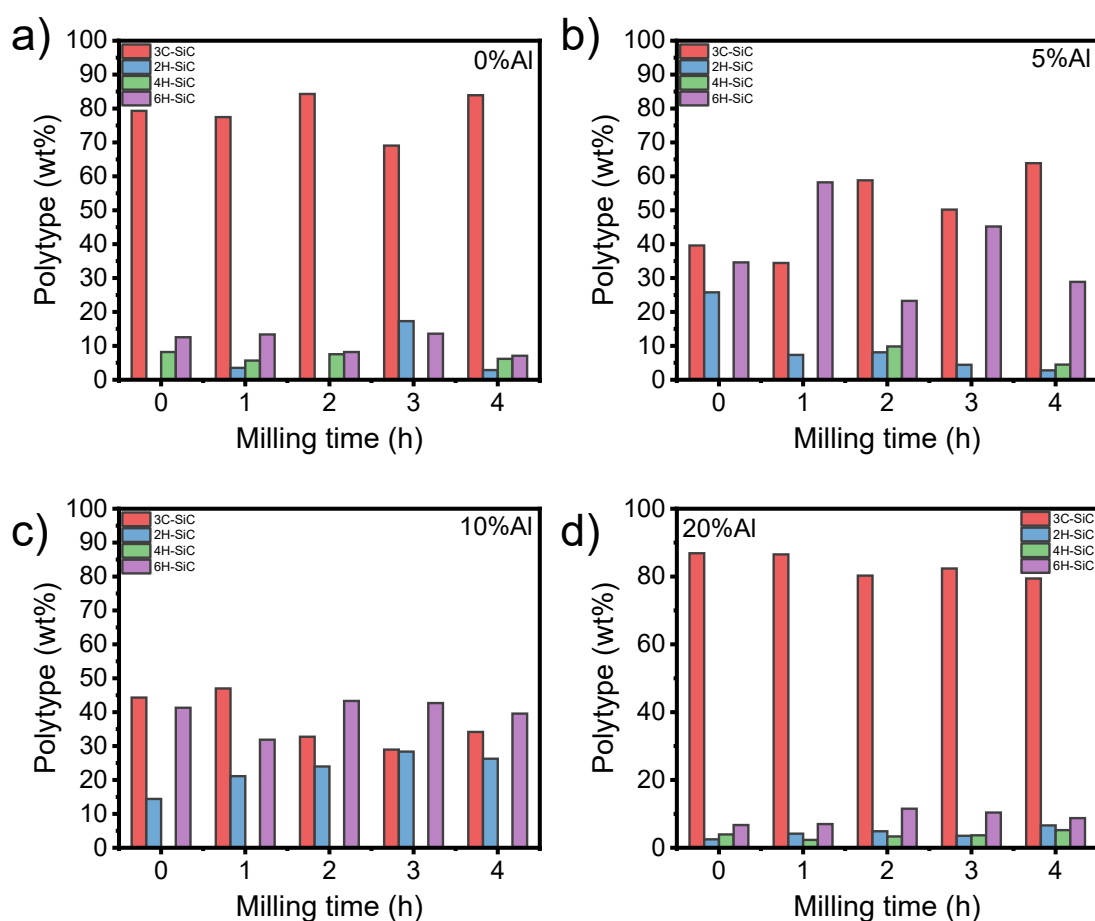

**Figure S4.** Result from the Rietveld fitting (polytype composition) after 0-4h milling times for samples a) 0%, b)5%, c)10% and d) 20% Al added to the precursor mixture.

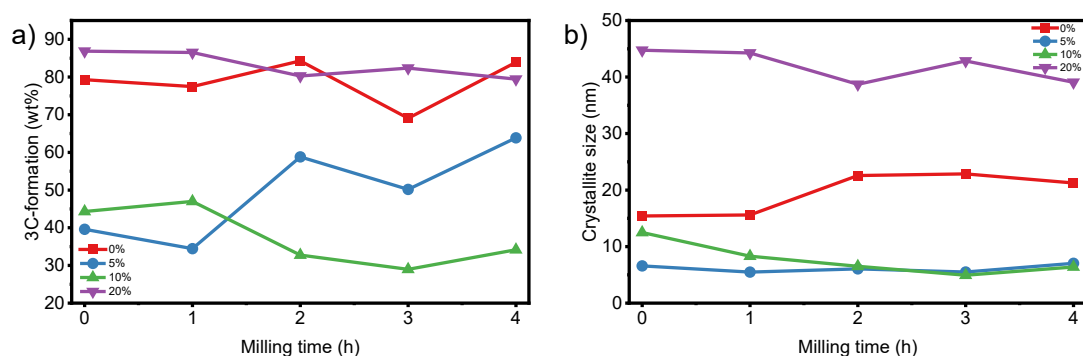

**Figure S5.** Cubic phase content (a) and crystallite size (b) as functions of milling time. These data are identical to those presented in Fig. 3 of the main text, where they were depicted as functions of Al concentration in the precursor.

## Raman Data

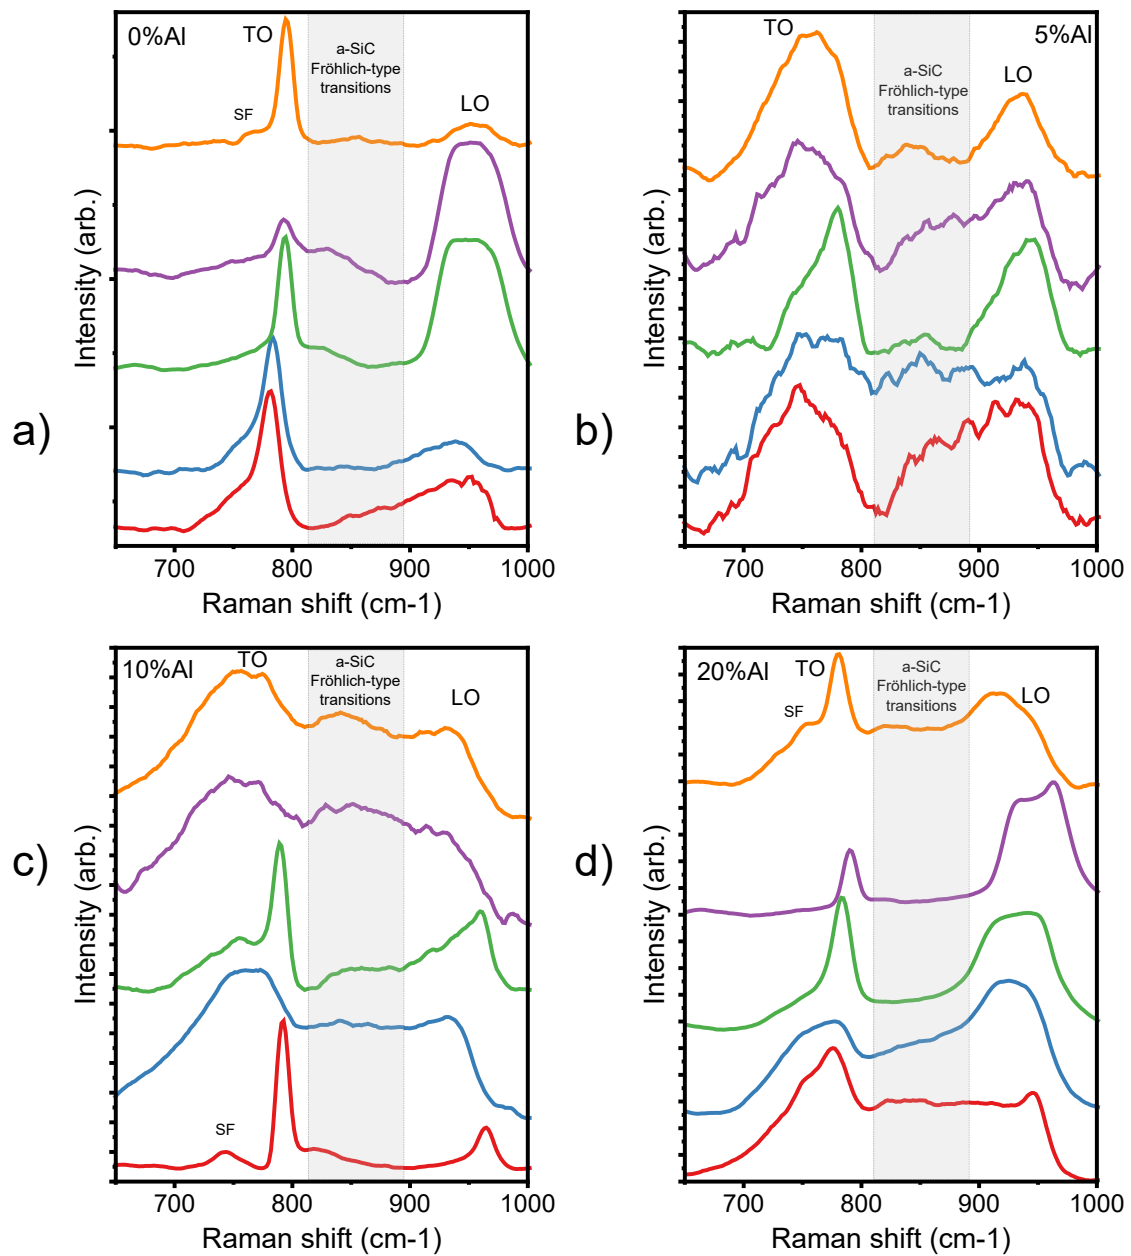

**Figure S6. Raman spectra of the samples after 0-4h milling times for samples a) 0%, b) 5%, c) 10% and d) 20% Al added to the precursor mixture.**

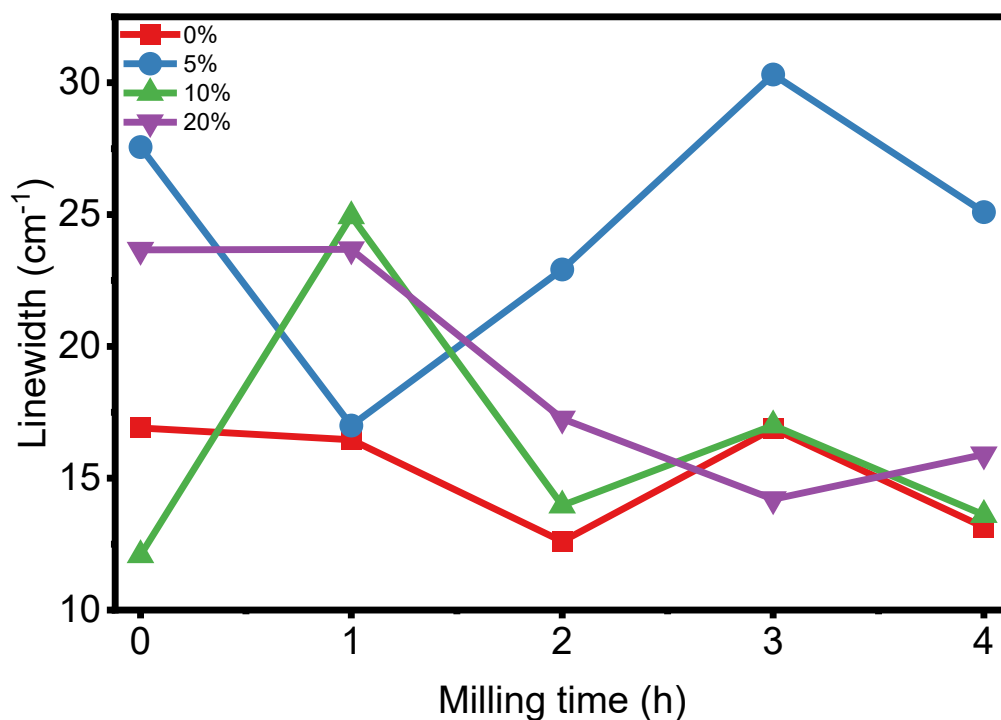

**Figure S7.** Linewidth of TO peaks after fitting with a Voigt function, that correlates with SF concentration[70,72] as functions of milling time. These data are identical to those presented in Fig. 4 of the main text, where they were depicted as functions of Al concentration in the precursor.

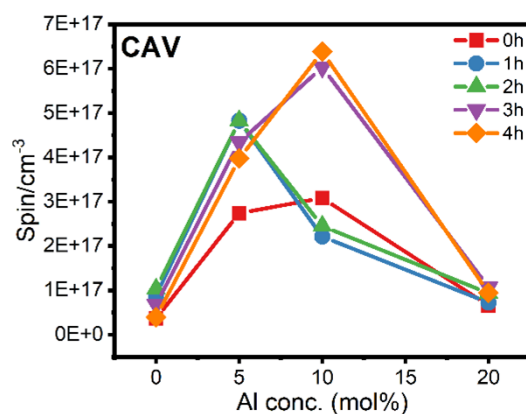

**Figure S8** Area for the Raman peak around 720-730  $\text{cm}^{-1}$  This area has been associated with the presence of CAV in SiC

## EPR Data

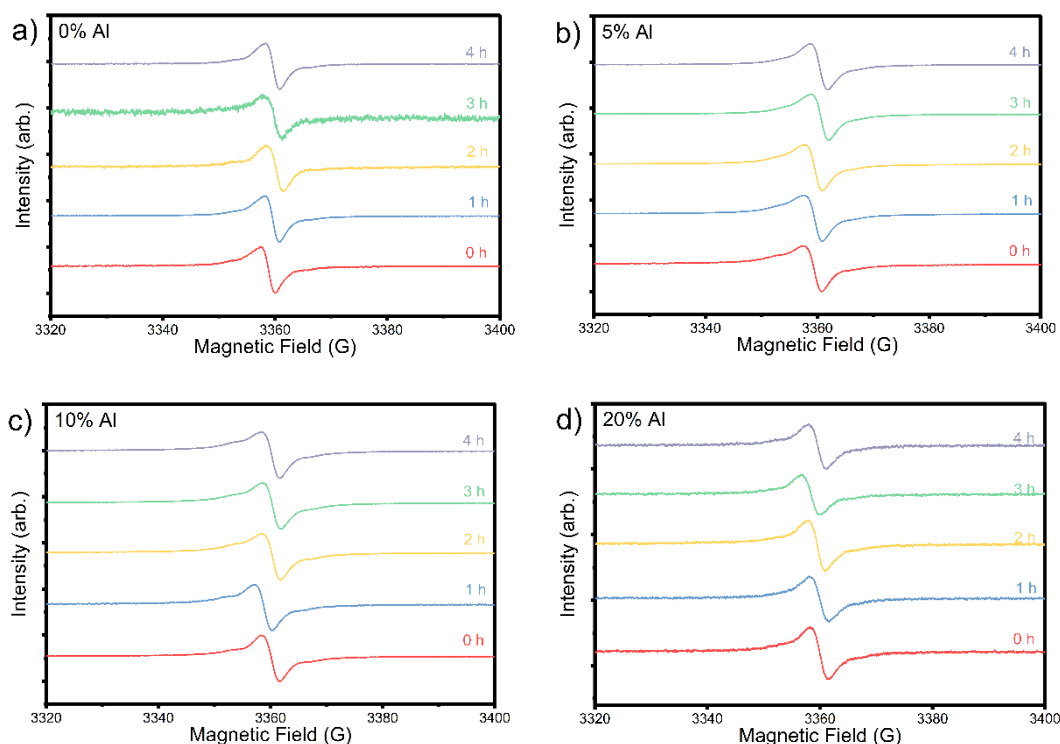

**Figure S9.** EPR spectra after 0-4h milling times for samples a) 0%, b) 5%, c) 10% and d) 20% Al added to the precursor mixture.

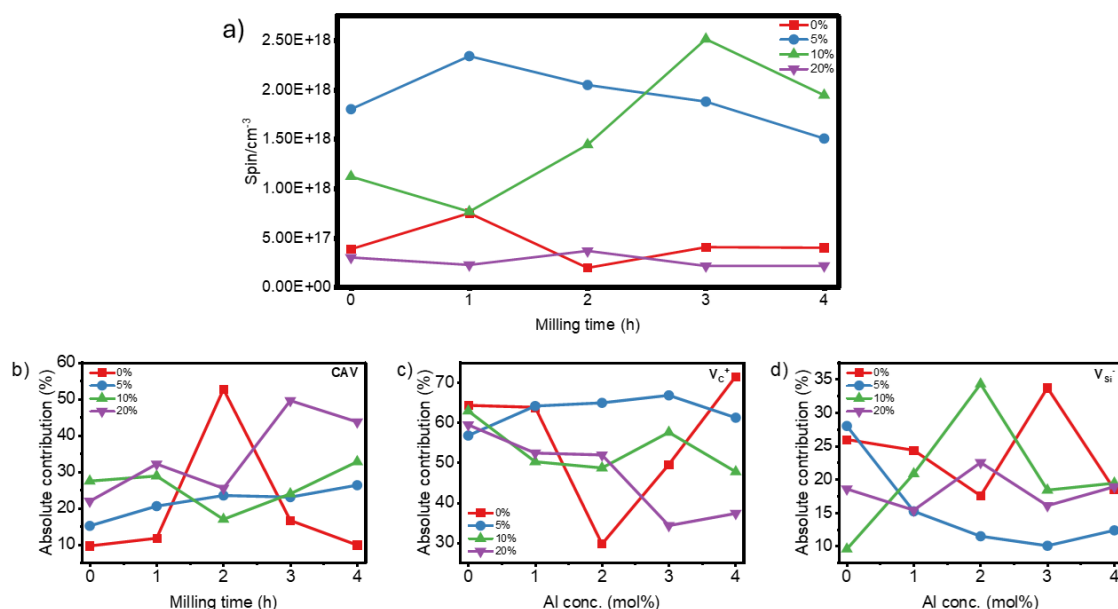

**Figure S10.** a) Calculated defect concentration as a function of Al concentration in the precursor for various milling times. The contribution of the three vacancies, b) carbon antisite vacancy pair (CAV), c) carbon vacancy (V<sub>C</sub><sup>+</sup>), and d) silicon vacancy (V<sub>Si</sub><sup>-</sup>), which were used to simulate the experimental data. These data are identical to those presented in Fig. 5 of the main text, where they were depicted as functions of Al concentration in the precursor.

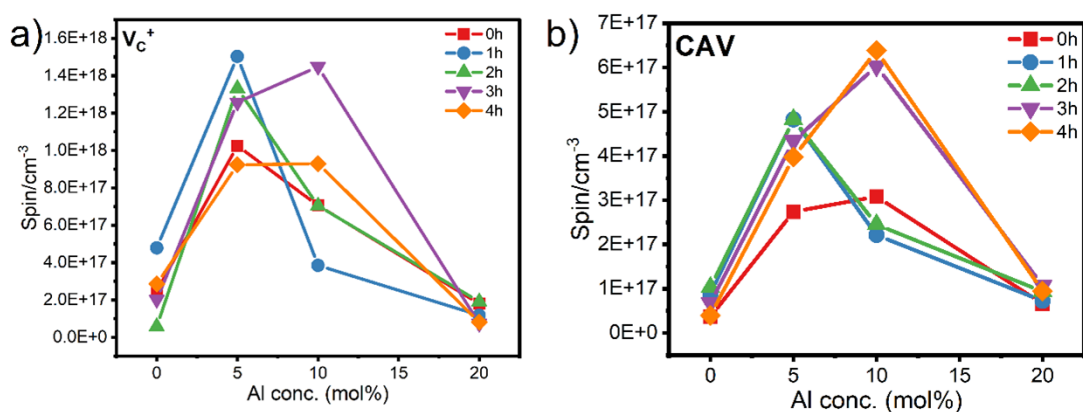

**Figure S11.** Calculated defect concentration as a function of Al concentration in the precursor for various milling times. The spin concentration a) carbon vacancy ( $V_c^+$ ) and b) carbon antisite vacancy pair (CAV), silicon vacancy ( $V_{Si^-}$ ) can be found in the main text.

### Photoluminescence Measurement Data

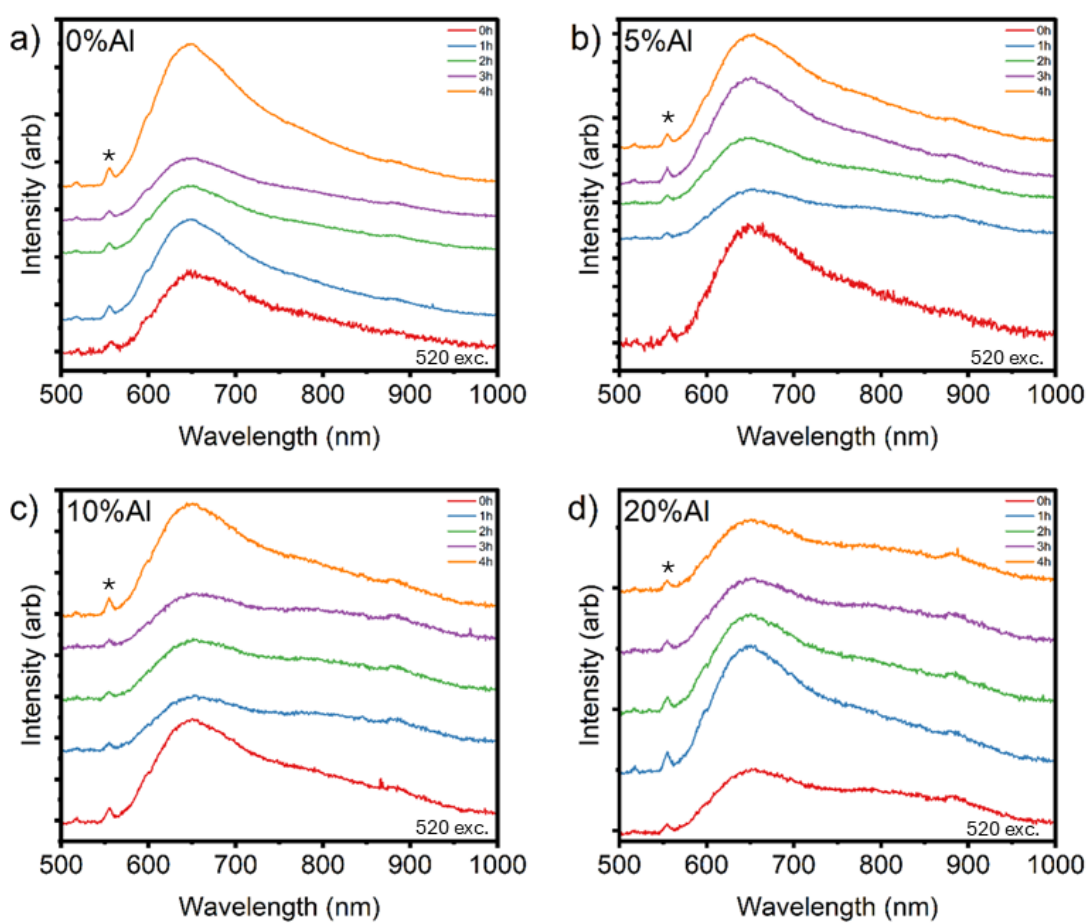

**Figure S12.** PL measurements were acquired using a 520 nm excitation laser after 0-4h milling times for samples a) 0%, b)5%, c)10% and d) 20% Al added to the precursor mixture. The asterisk (\*) denotes an artifact originating from the sample holder.

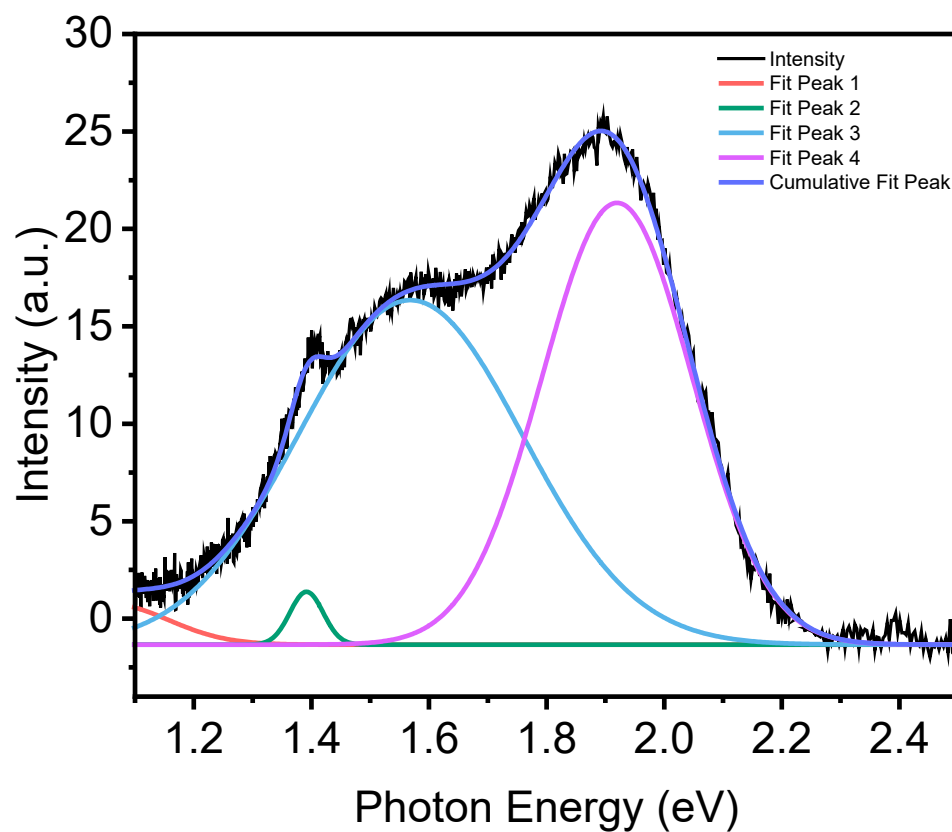

**Figure S13.** Example of a fitting procedure used to extract the peak values from photoluminescence (PL) spectra.



## Statistical Calculations

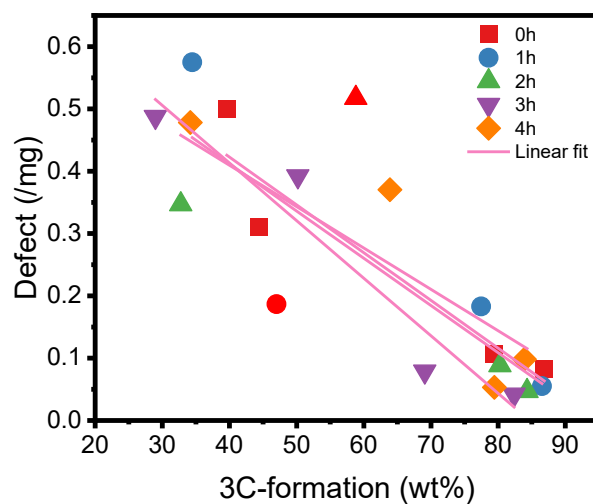

**Figure S14** Linear regression model used to calculate the values of Pearson's  $r$  values of -0.94, -0.99, -0.99, -0.96, and -0.92 for time intervals of 0 h, 1 h, 2 h, 3 h, and 4 h, respectively.

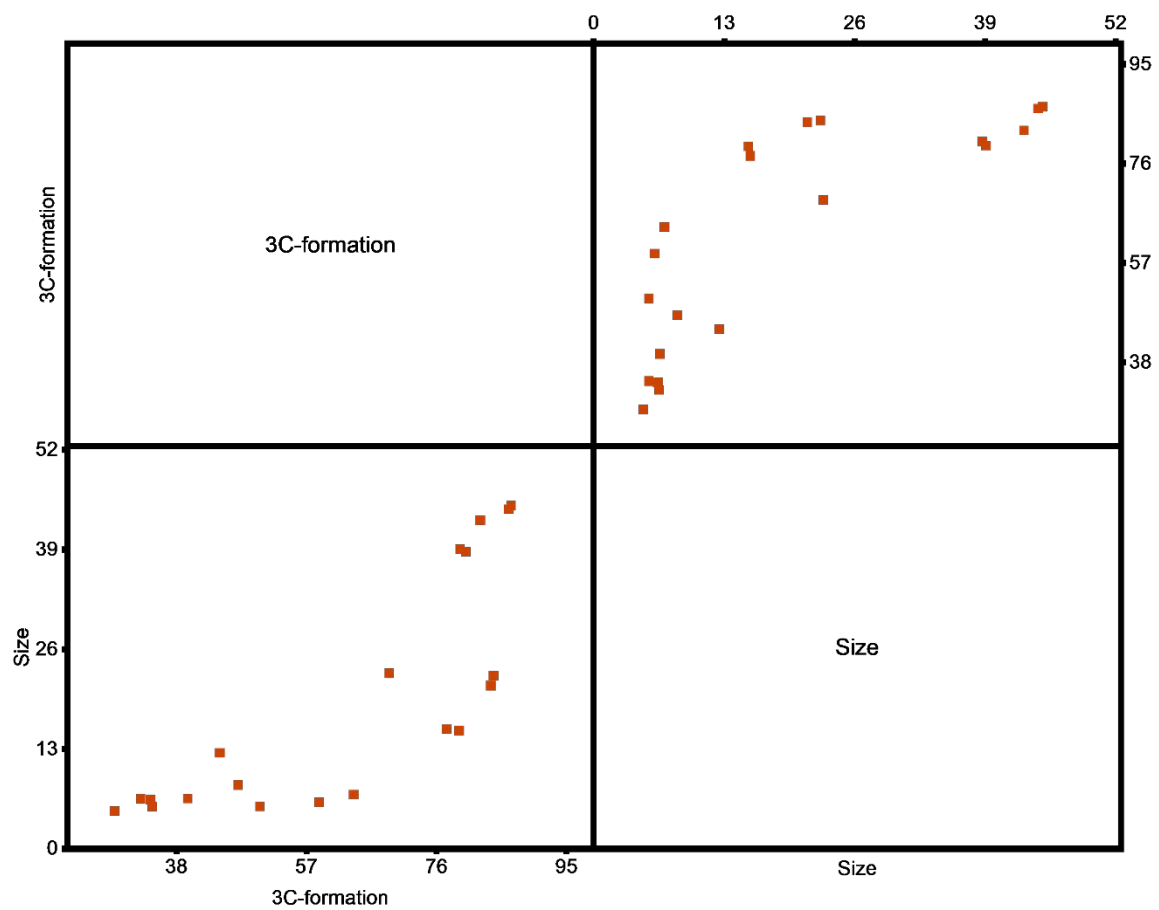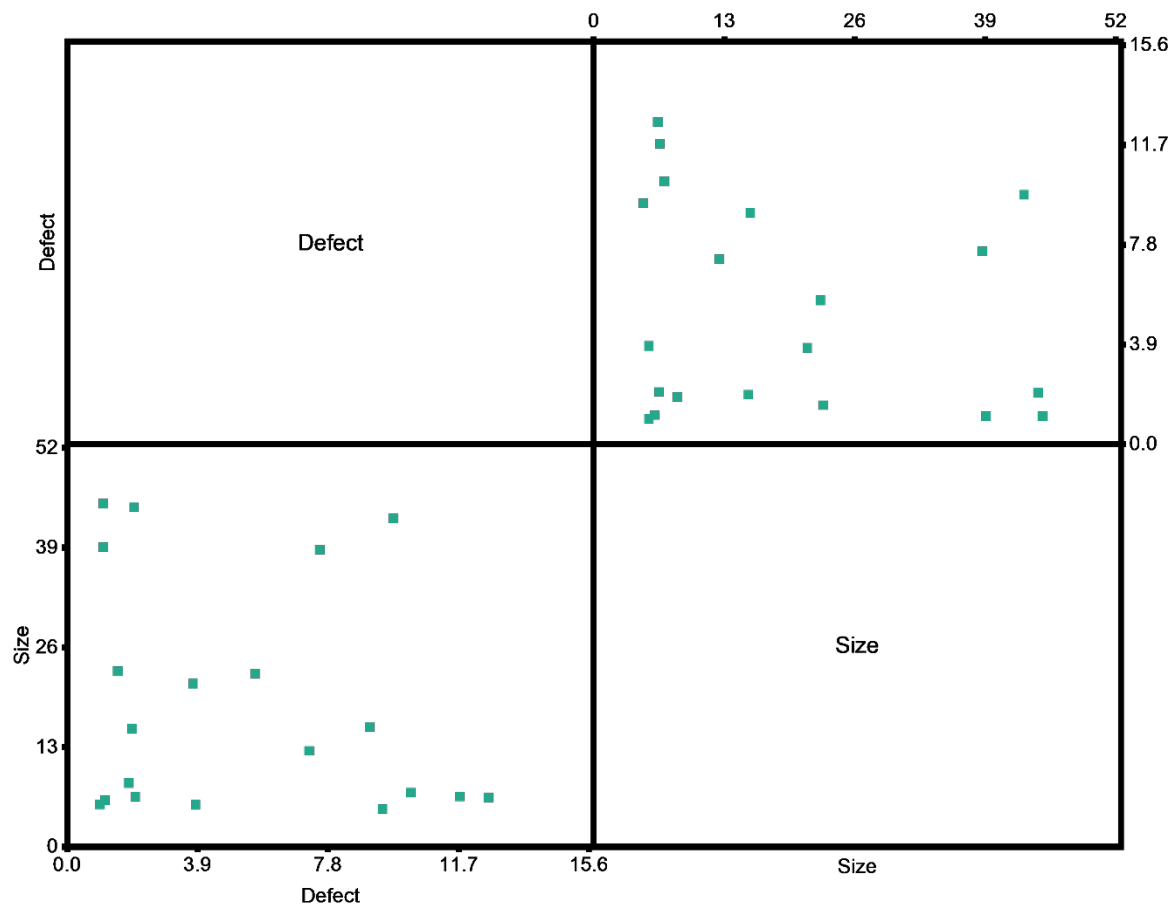

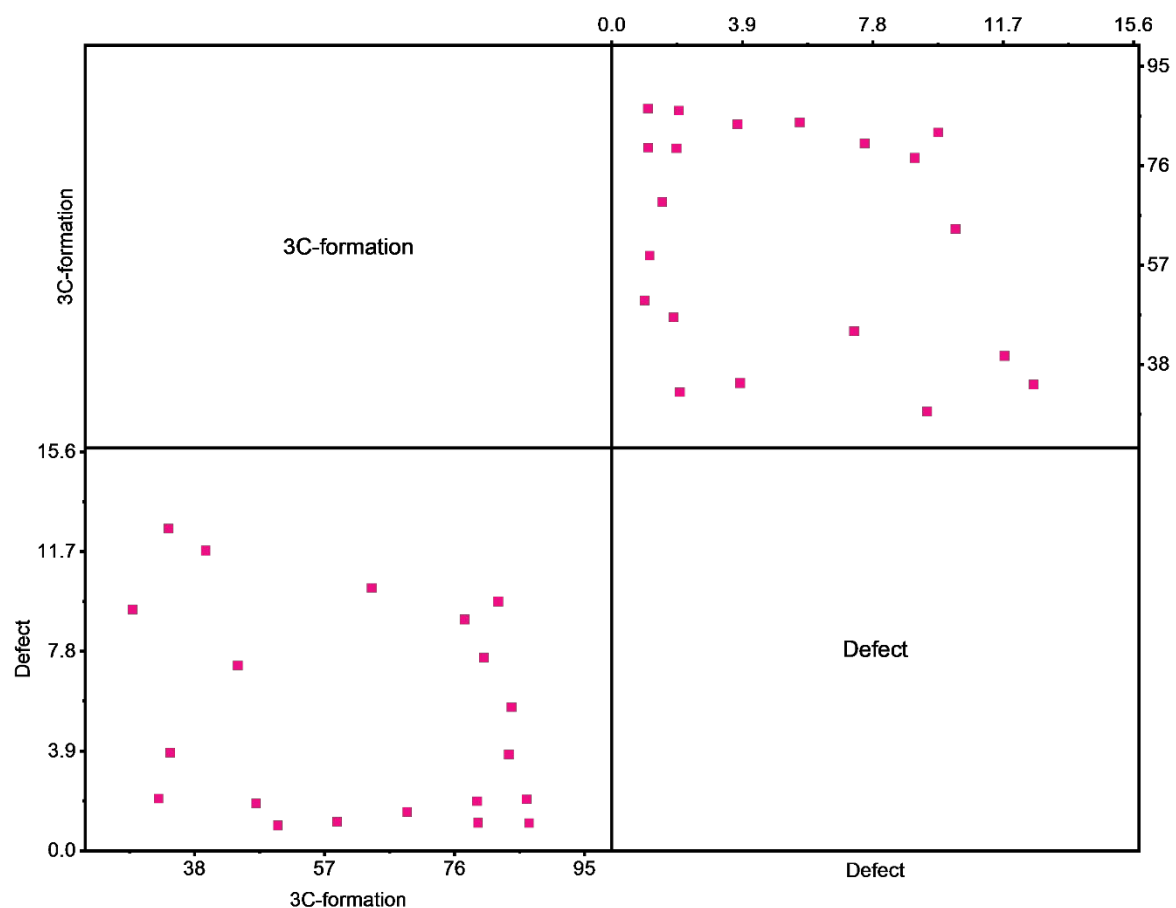

**Figure S15.** Spearman scatter matrix for b) size vs. 3C-formation ( $r_s = 0.87$ ,  $p\text{-value} < 0.0001$ ), c) size vs. defect ( $r_s = -0.20$ ,  $p\text{-value} = 0.38$ ) and d) 3C-formation vs. defect ( $r_s = -0.26$ ,  $p\text{-value} = 0.25$ ).

**Table S1.** Spearman's correlation results for 3C-formation vs. size

| Sample | $r_s$ | p-value  |
|--------|-------|----------|
| 0h     | 1     | < 0.0001 |
| 1h     | 1     | < 0.0001 |
| 2h     | 0.6   | 0.4      |
| 3h     | 1     | < 0.0001 |
| 4h     | 0.8   | 0.2      |

**Table S2.** Spearman's correlation results for defect vs. size.

| Sample | $r_s$ | p-value  |
|--------|-------|----------|
| 0h     | -1    | < 0.0001 |
| 1h     | 0     | 1        |
| 2h     | 1     | < 0.0001 |
| 3h     | 0.4   | 0.6      |
| 4h     | -1    | < 0.0001 |

**Table S3.** Spearman's correlation results for defect vs. 3C-formation.

| Sample | $r_s$ | p-value  |
|--------|-------|----------|
| 0h     | -1    | < 0.0001 |
| 1h     | 0     | 1        |
| 2h     | 0.6   | 0.4      |
| 3h     | 0.4   | 0.6      |
| 4h     | -0.8  | 0.2      |

**Table S4.** Pearsons' r results for size vs defects.

| Sample | r     | $R^2$   |
|--------|-------|---------|
| 0h     | -0.31 | 0.09    |
| 1h     | -0.15 | 0.02    |
| 2h     | 0.31  | 0.10    |
| 3h     | -0.63 | 0.4     |
| 4h     | 0.018 | 0.00003 |

**Table S5.** Pearsons' r results for size vs 3C-formation.

| Sample | r     | $R^2$ |
|--------|-------|-------|
| 0h     | 0.15  | 0.02  |
| 1h     | 0.42  | 0.18  |
| 2h     | -0.85 | 0.58  |
| 3h     | 0.70  | 0.50  |
| 4h     | -0.11 | 0.012 |

**Table S6.** Raman PCA results.

| component | eigenvalue | explained variance % | cumulative variance % |
|-----------|------------|----------------------|-----------------------|
| 'PC1'     | '7.4363'   | '47.0743'            | '47.0743'             |
| 'PC2'     | '4.9107'   | '31.0866'            | '78.1609'             |
| 'PC3'     | '1.3121'   | '8.3062'             | '86.4671'             |

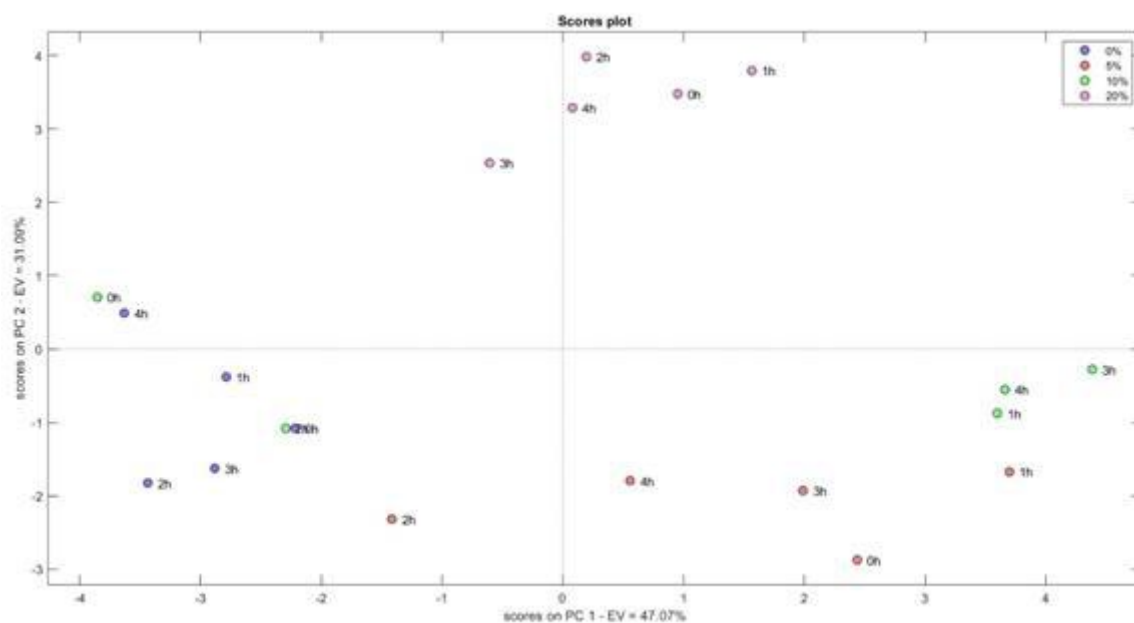

**Figure S16.** Scores plot for the PCA results from Raman.

**Table S7.** XRD PCA results.

| component | eigenvalue       | explained variance % | cumulative variance % |
|-----------|------------------|----------------------|-----------------------|
| 'PC1'     | '302672211.8853' | '62.1084'            | '62.1084'             |
| 'PC2'     | '152427922.2212' | '31.2782'            | '93.3866'             |
| 'PC3'     | '11794807.507'   | '2.4203'             | '95.8069'             |

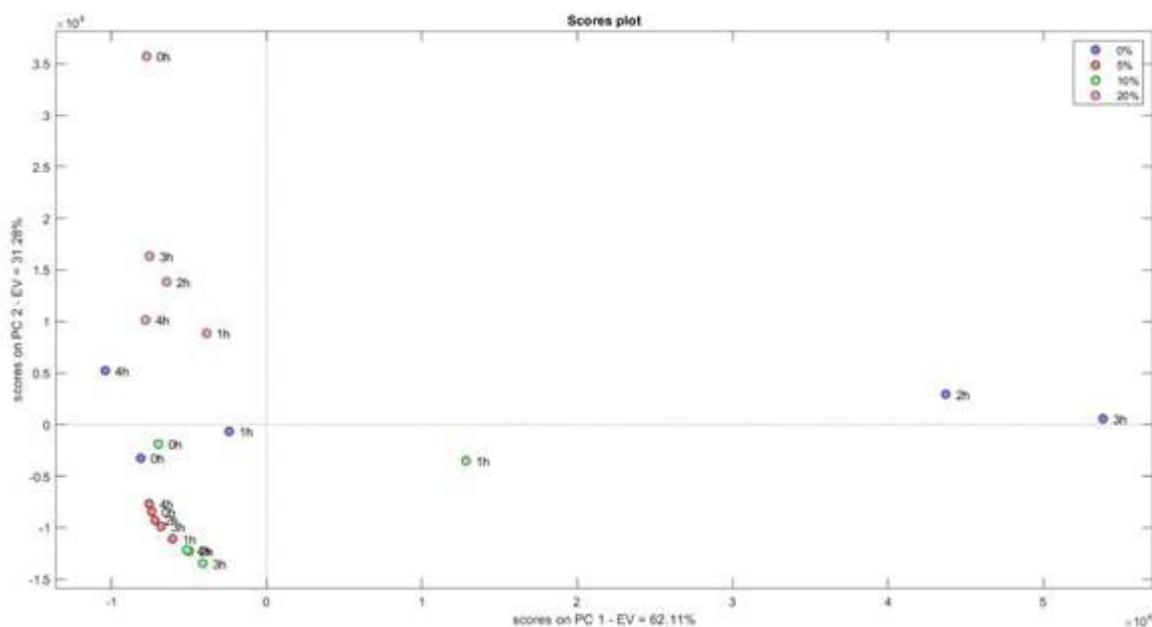

**Figure S17.** Scores plot for the PCA results from XRD.
